# Supplementary material for: Nickel and cobalt-based tungstate nanocomposites as promising electrocatalysts in alkaline direct methanol fuel cells
Source: Royal Society of Chemistry journal article supplement (doi:10.1039/d3na01118f), 2024-01-01
Supplement: d3na01118f1.pdf [file d3na01118f1.pdf]

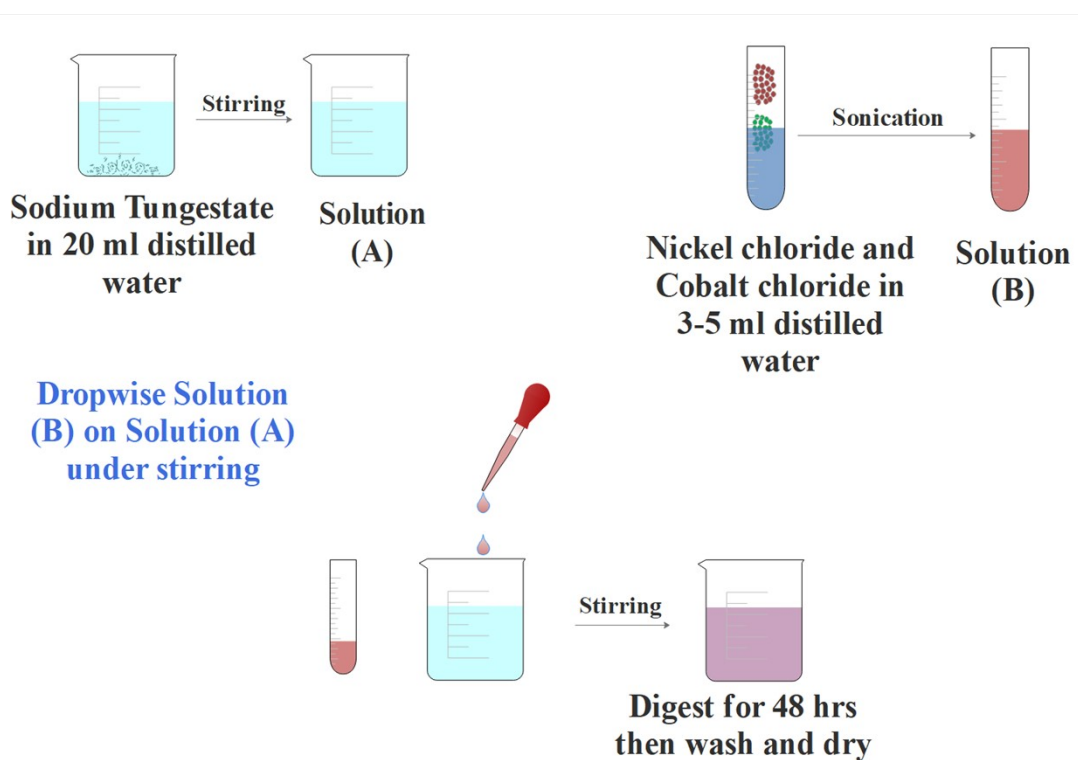

**Figure S1:** Schematic illustration for Nanocomposites' preparation.

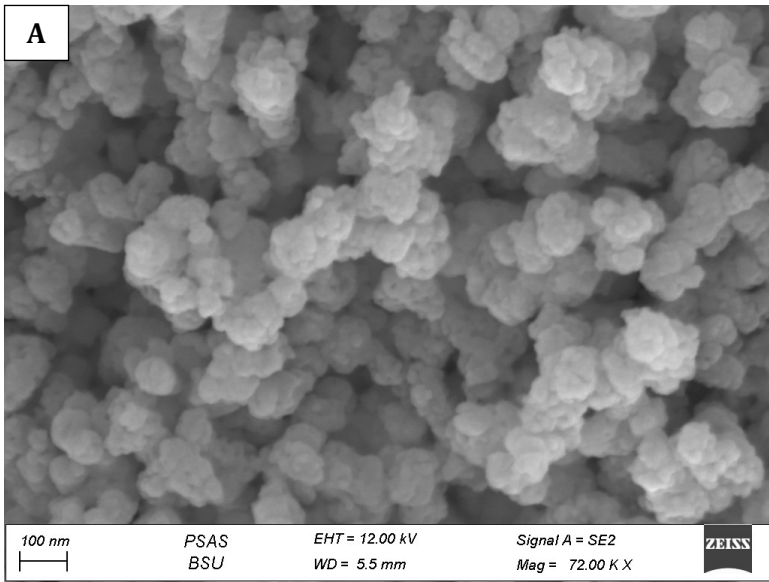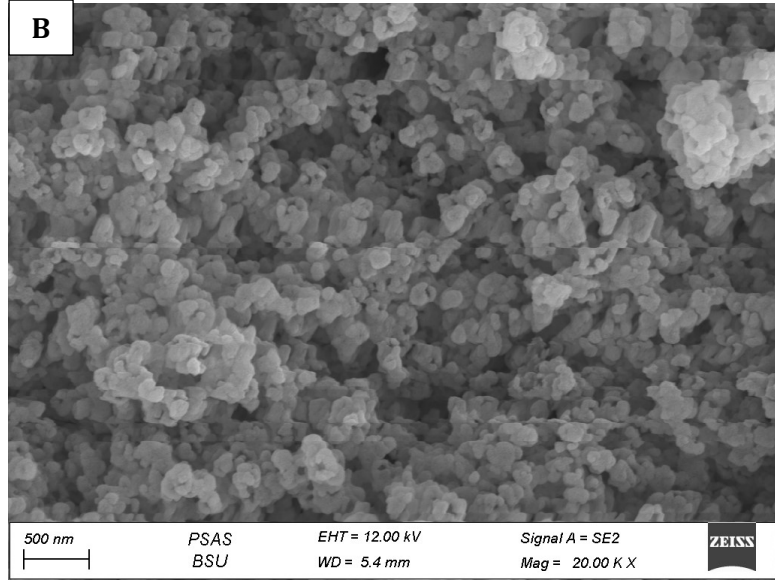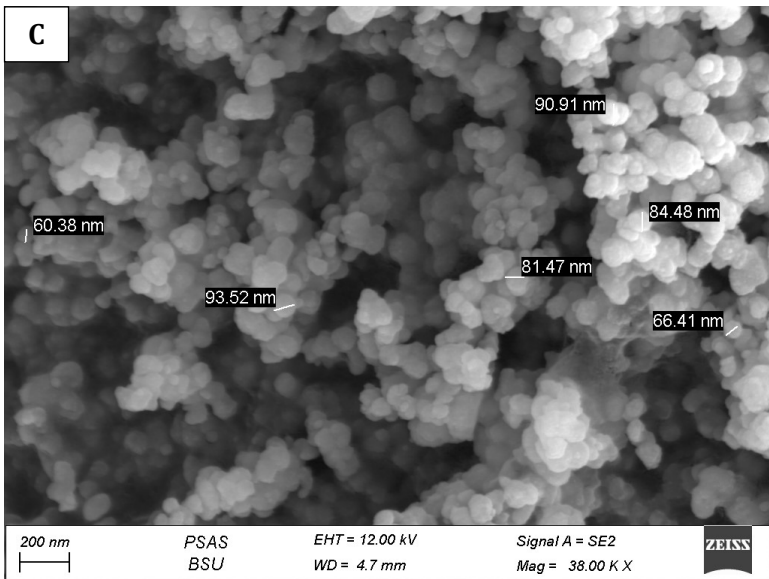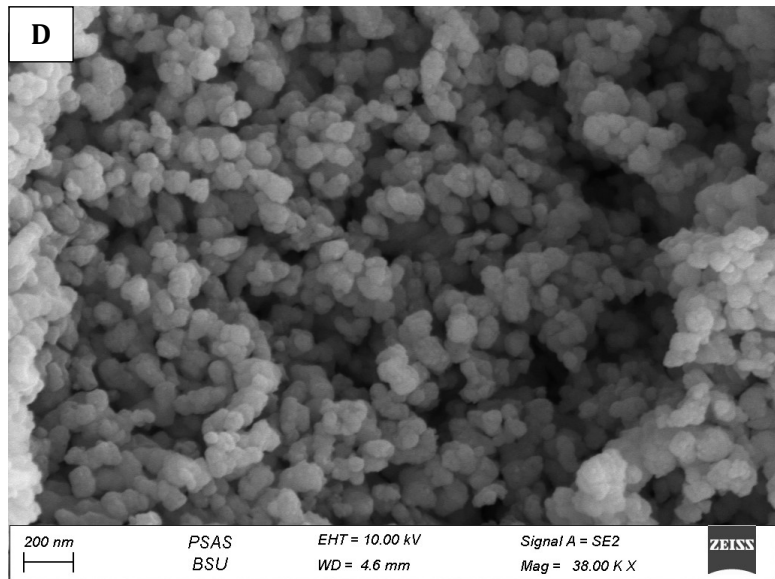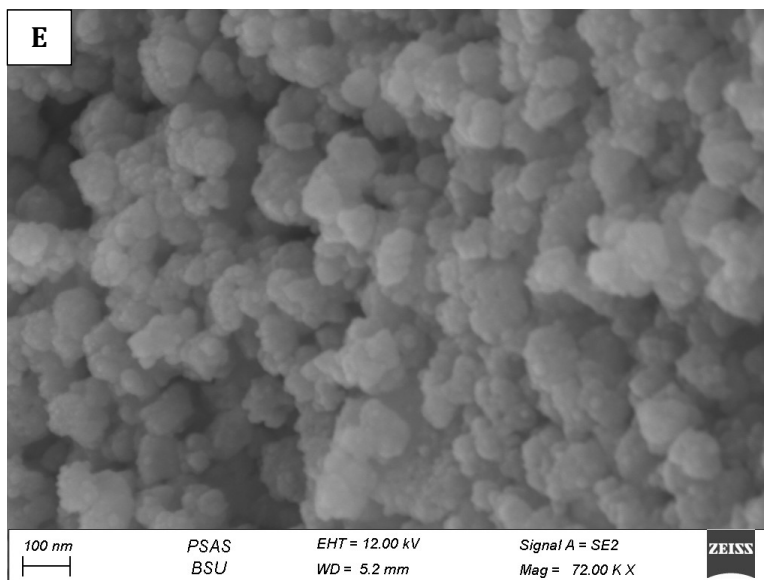

**Figure S2:** FESEM for samples W0.5 (A), W1 (B), W1.5 (C), W2 (D), W4 (E).

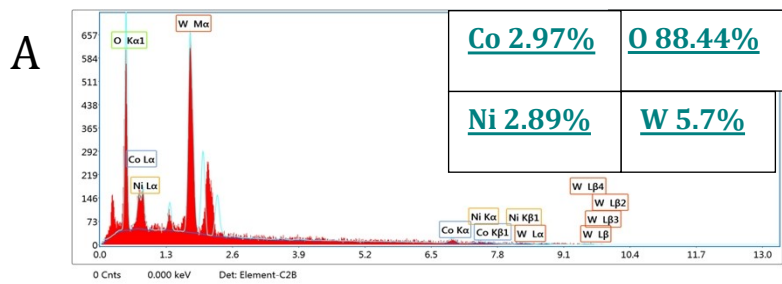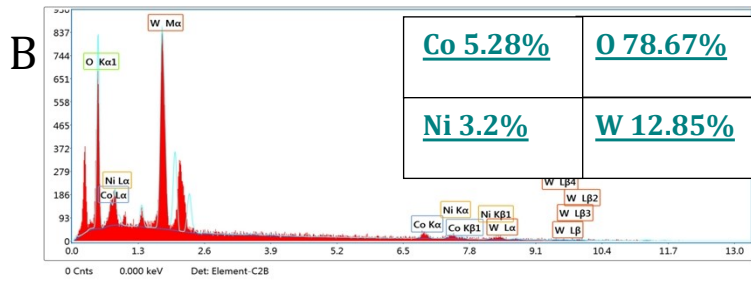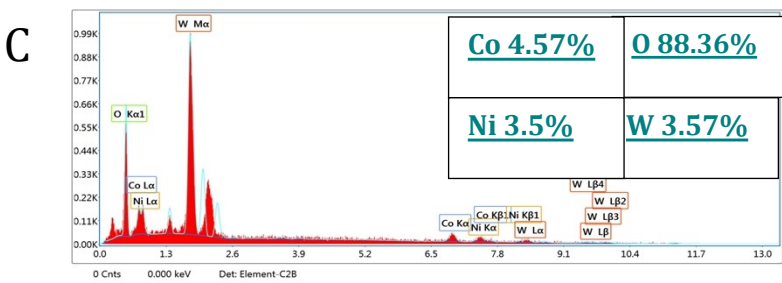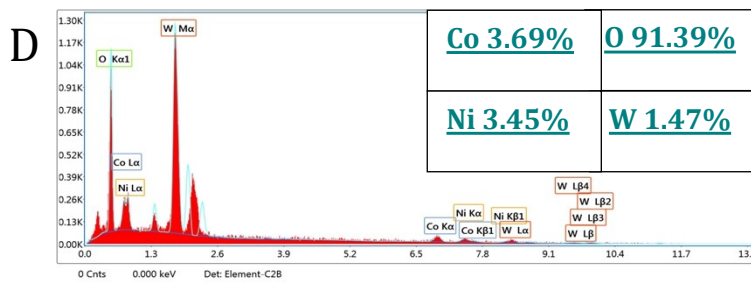

**Figure S3:** EDX for samples with atomic weight percentages, W2(a), W4(b), W1(c), W0.5(d)

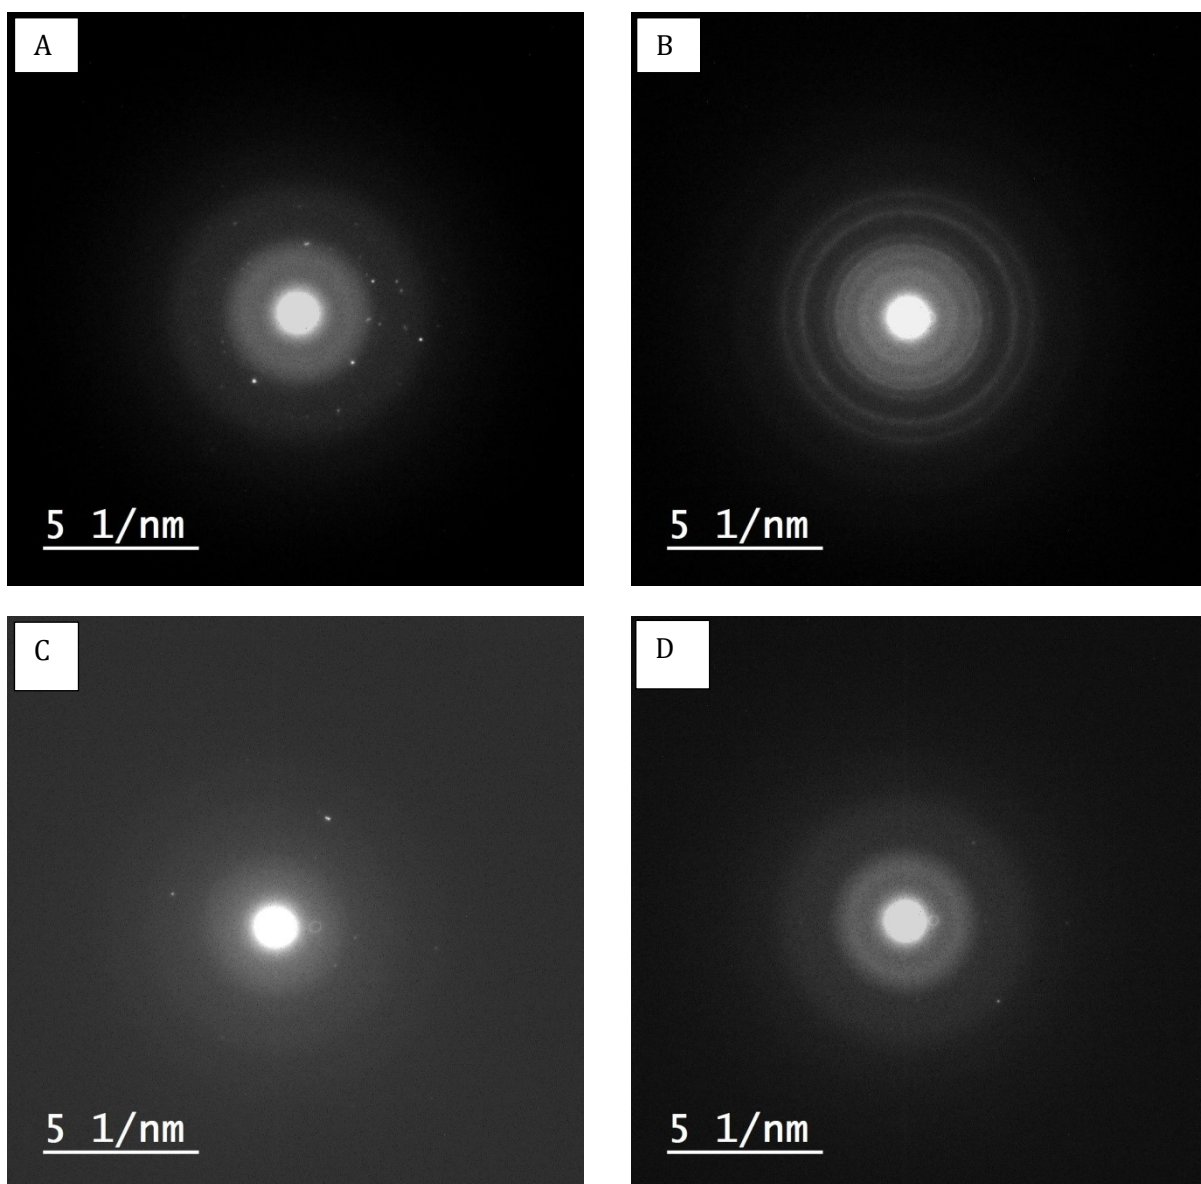

**Figure S4:** Diffraction pattern of samples under TEM W2 (A), W1 (B), W1.5 (C), W0.5 (D).



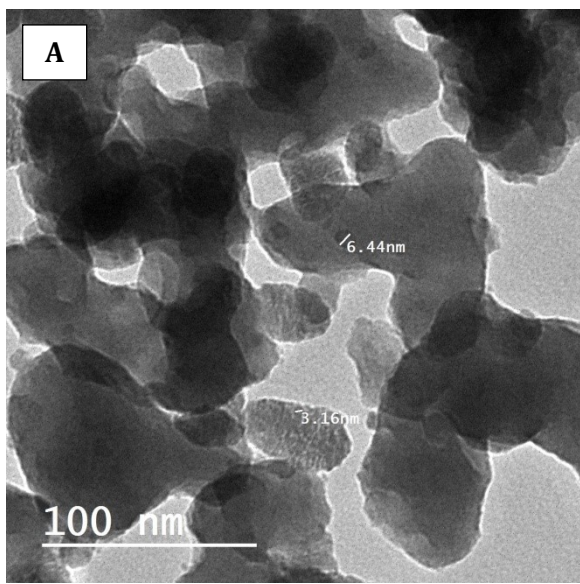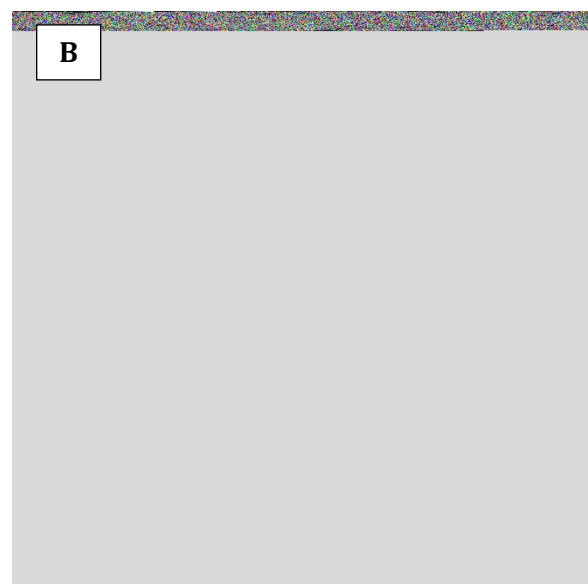

**Figure S5:** TEM image for W2 at 100nm magnification showing small round nanoparticles (A), showing platelet morphology (B).

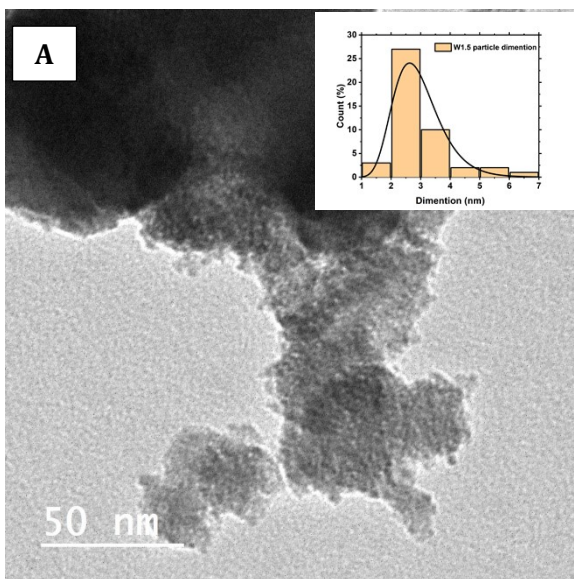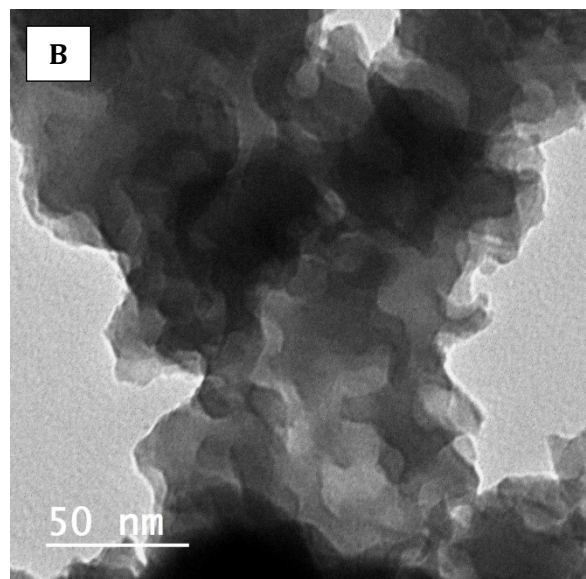

**Figure S6:** TEM images at 50 nm magnification for W1.5 showing small round particles (A), W0.5 at same magnification scale (B).

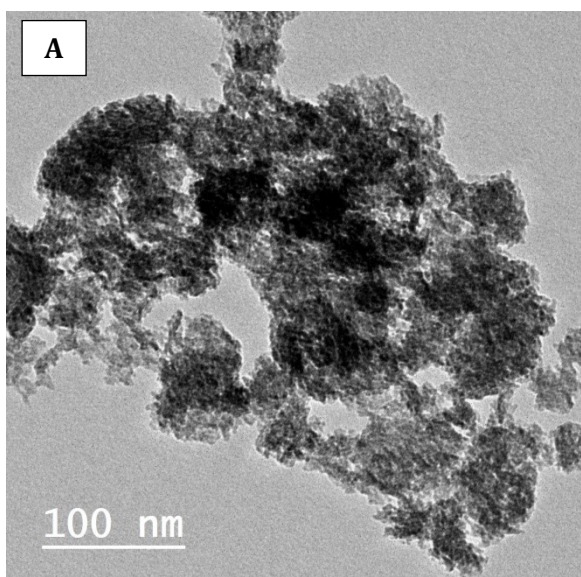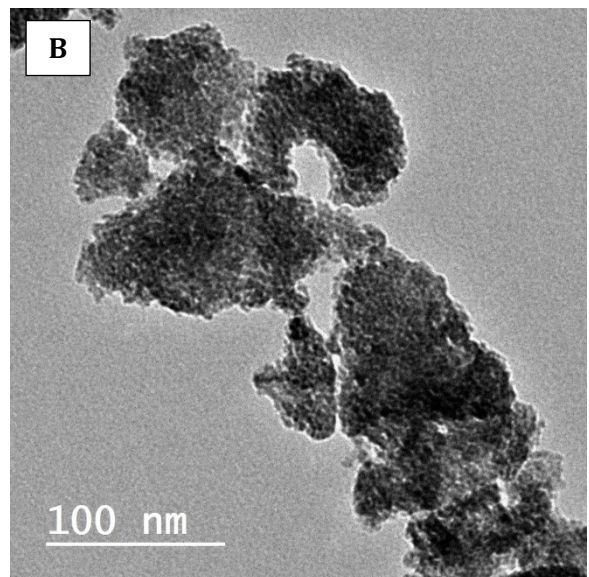

**Figure S7:** TEM images at 100 nm magnification for W1 (A), CW (B)

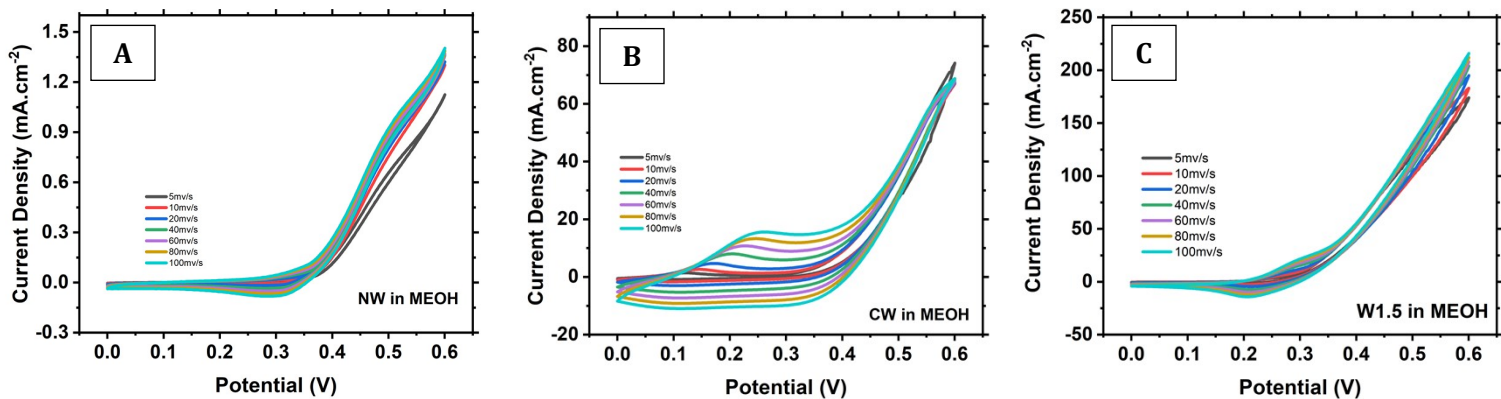

**Figure S8:** effect of scan rate in 1M KOH + 1M methanol for NW (A), CW (B), W1.5 (C).

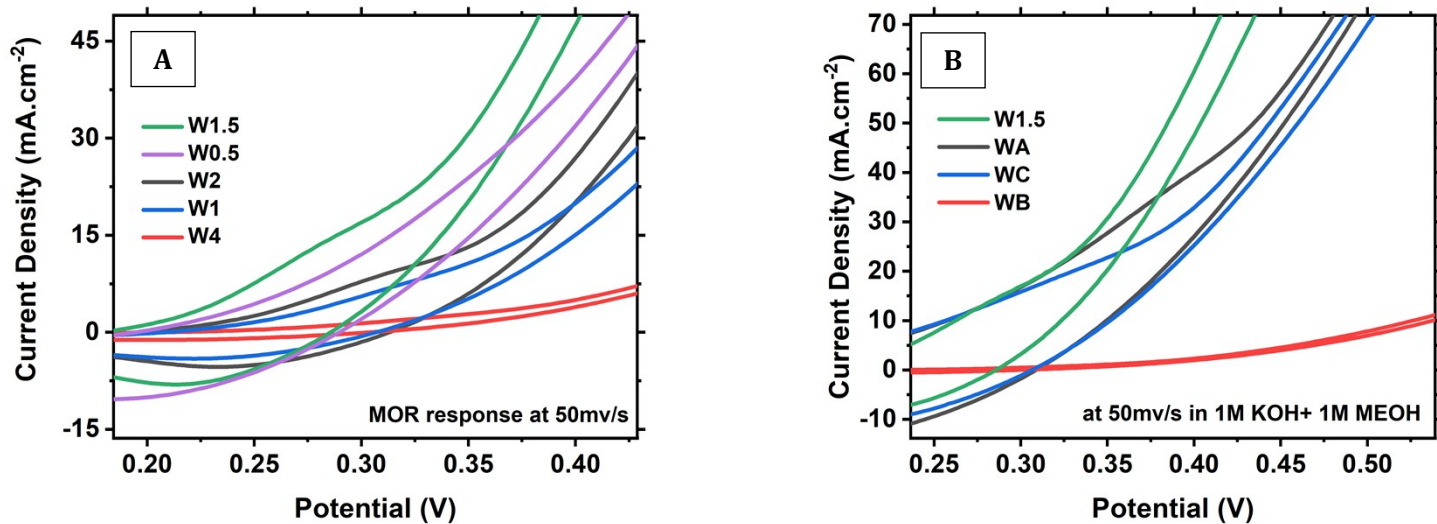

**Figure S9:** onset potential for W0.5, W1.5, W1, W2, W4 (A), W1.5, WA, WB, WC (B)



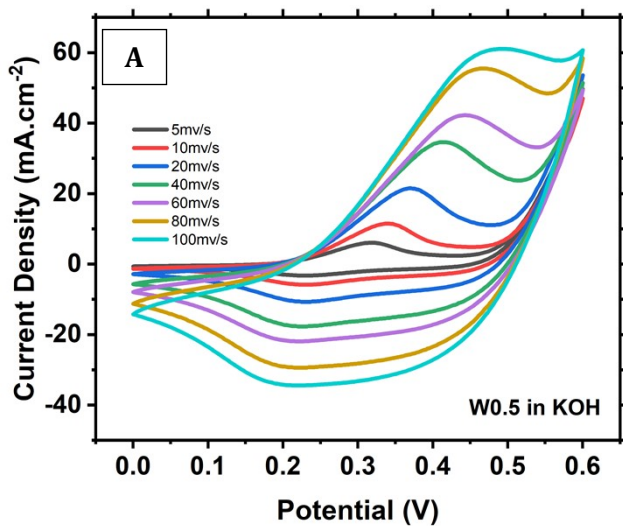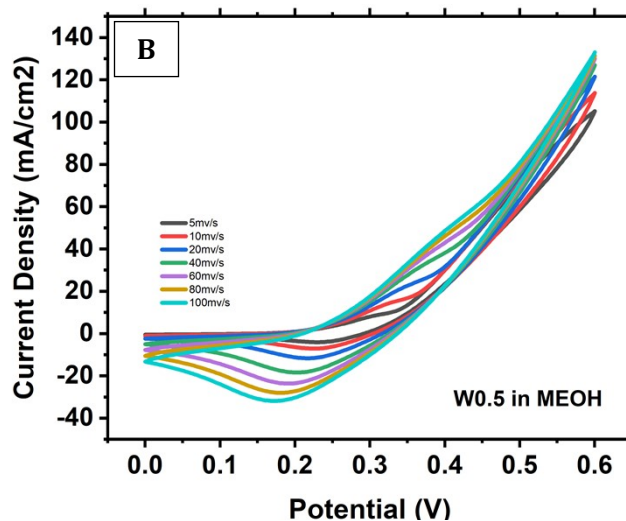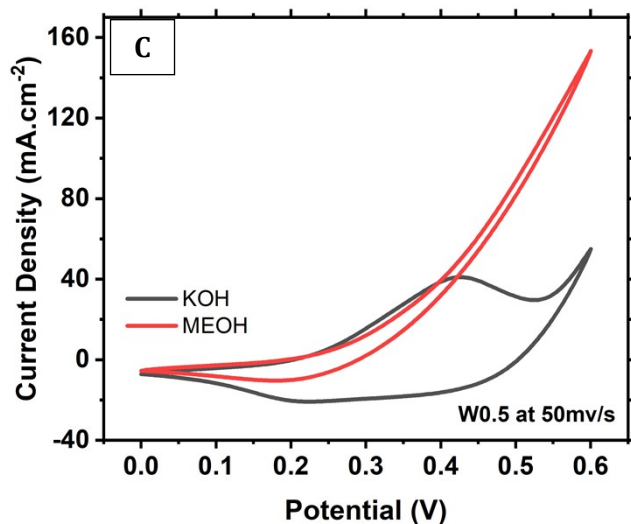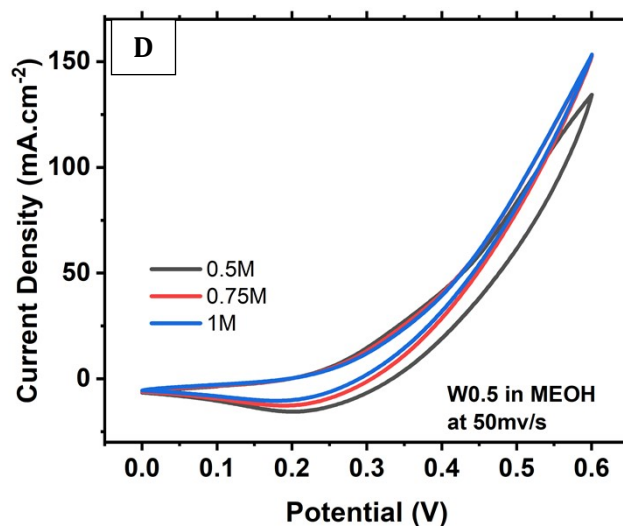

Figure S10: effect of scan rate on W0.5 in 1M KOH (A), Effect of scan rate on W0.5 in (1M KOH+1M Methanol) (B), W0.5 electrochemical response at 50mv/s (C), effect of different methanol concentration on W0.5 at scan rate 50mv/s (D).

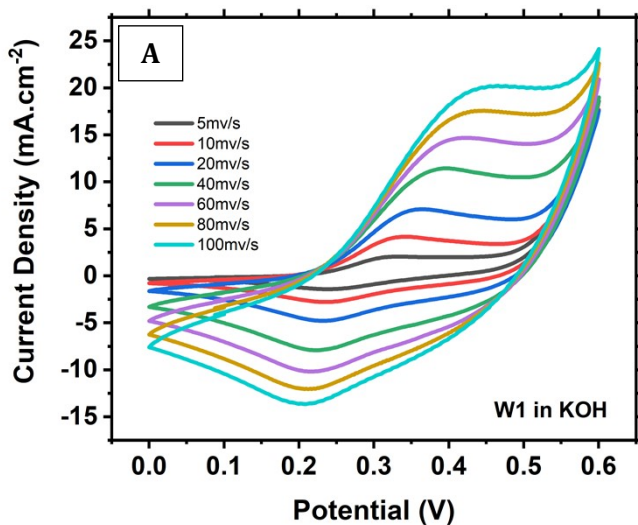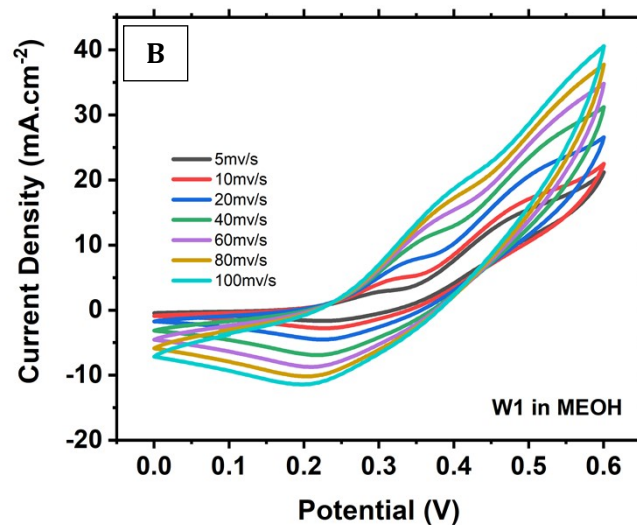

Figure S11: effect of scan rate on W1 in 1M KOH (A), Effect of scan rate on W1 in (1M KOH+1M Methanol) (B).

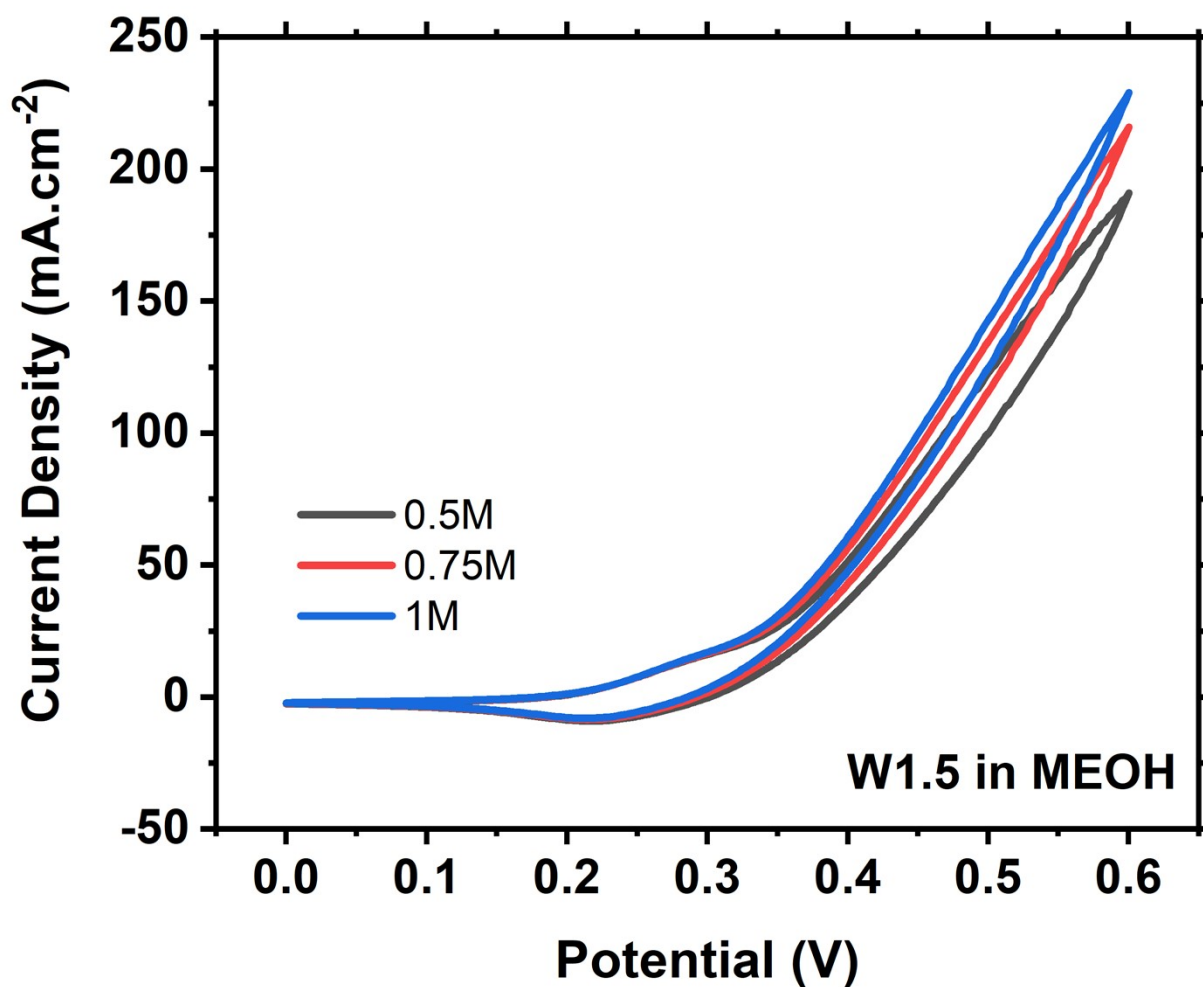

Figure S12: electrochemical response of W1.5 at different methanol concentrations at 50mV/s.

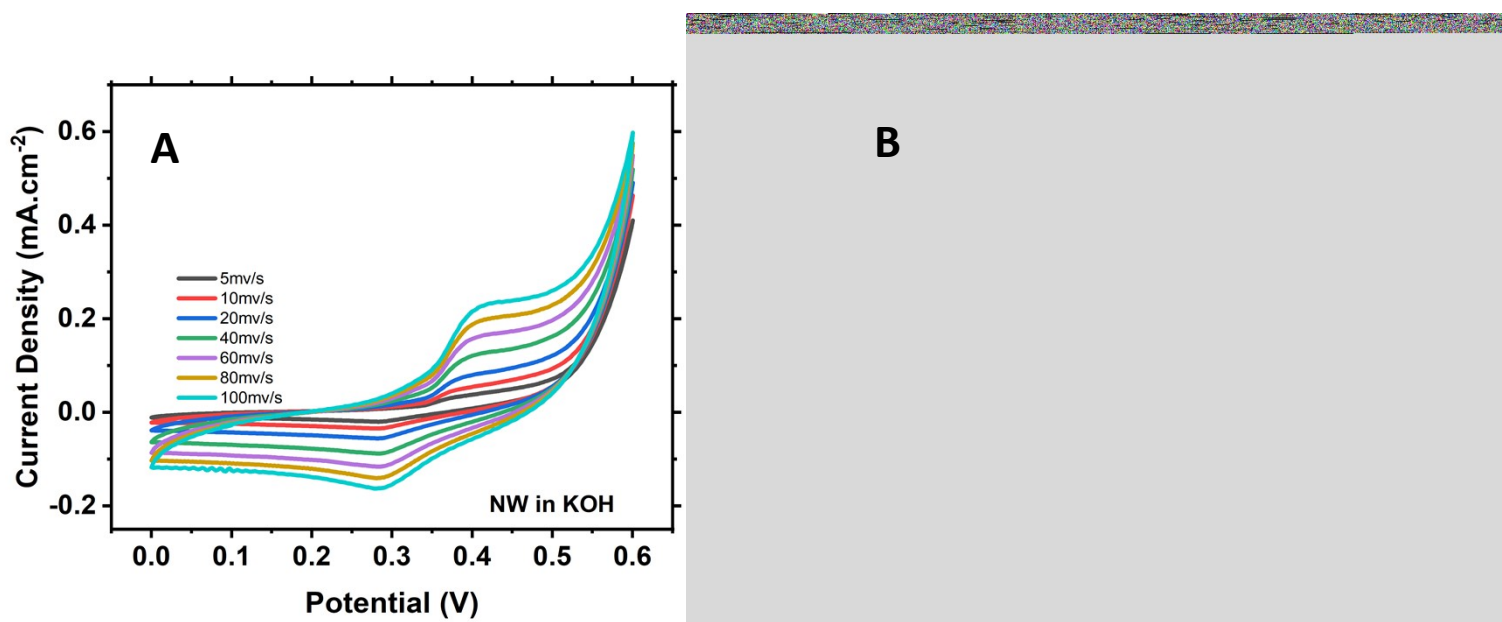

Figure S13: Effect of scan rate on NW at 1M KOH (A) and in 1M KOH+ 1M MEOH (B)



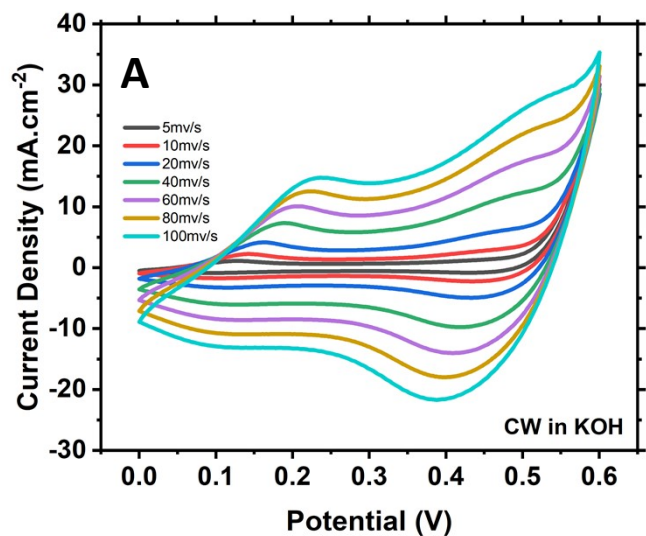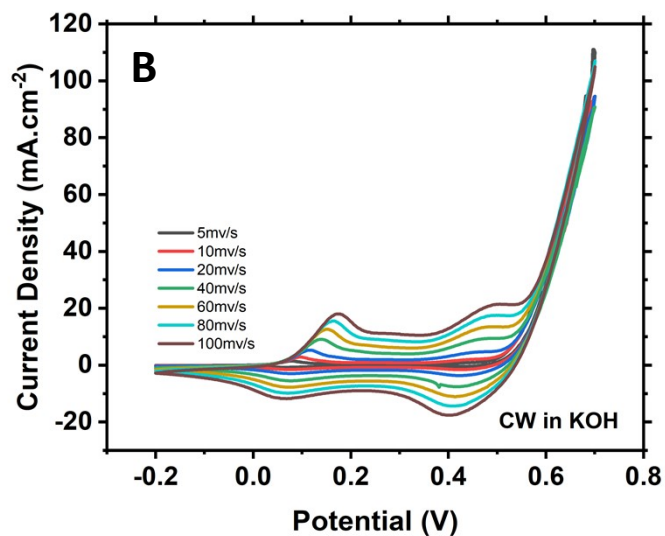

**Figure S14:** Effect of scan rate on CW at 1M KOH (A) and in 1M KOH+ 1M MEOH (B)

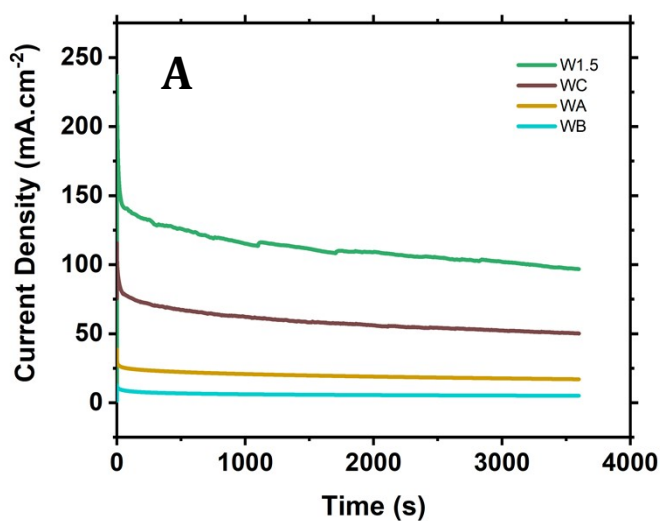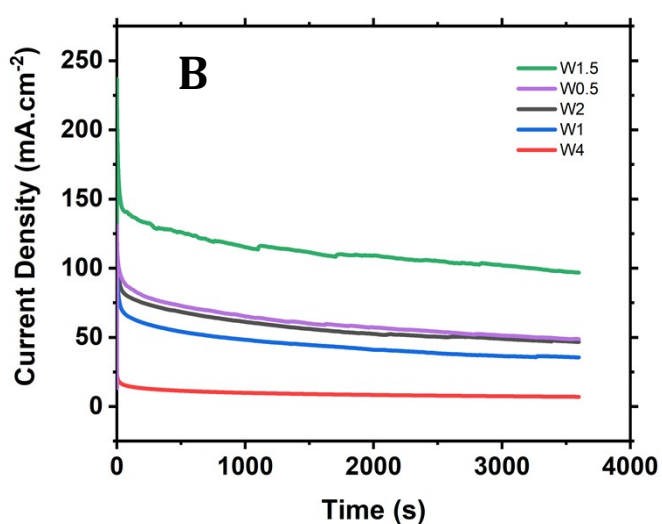

**Figure S15:** View of Stability measurements for samples at 0.6V for 3600s.(A): W1.5, WA, WB, WC. (B): W1.5, W0.5, W2, W1, W4.

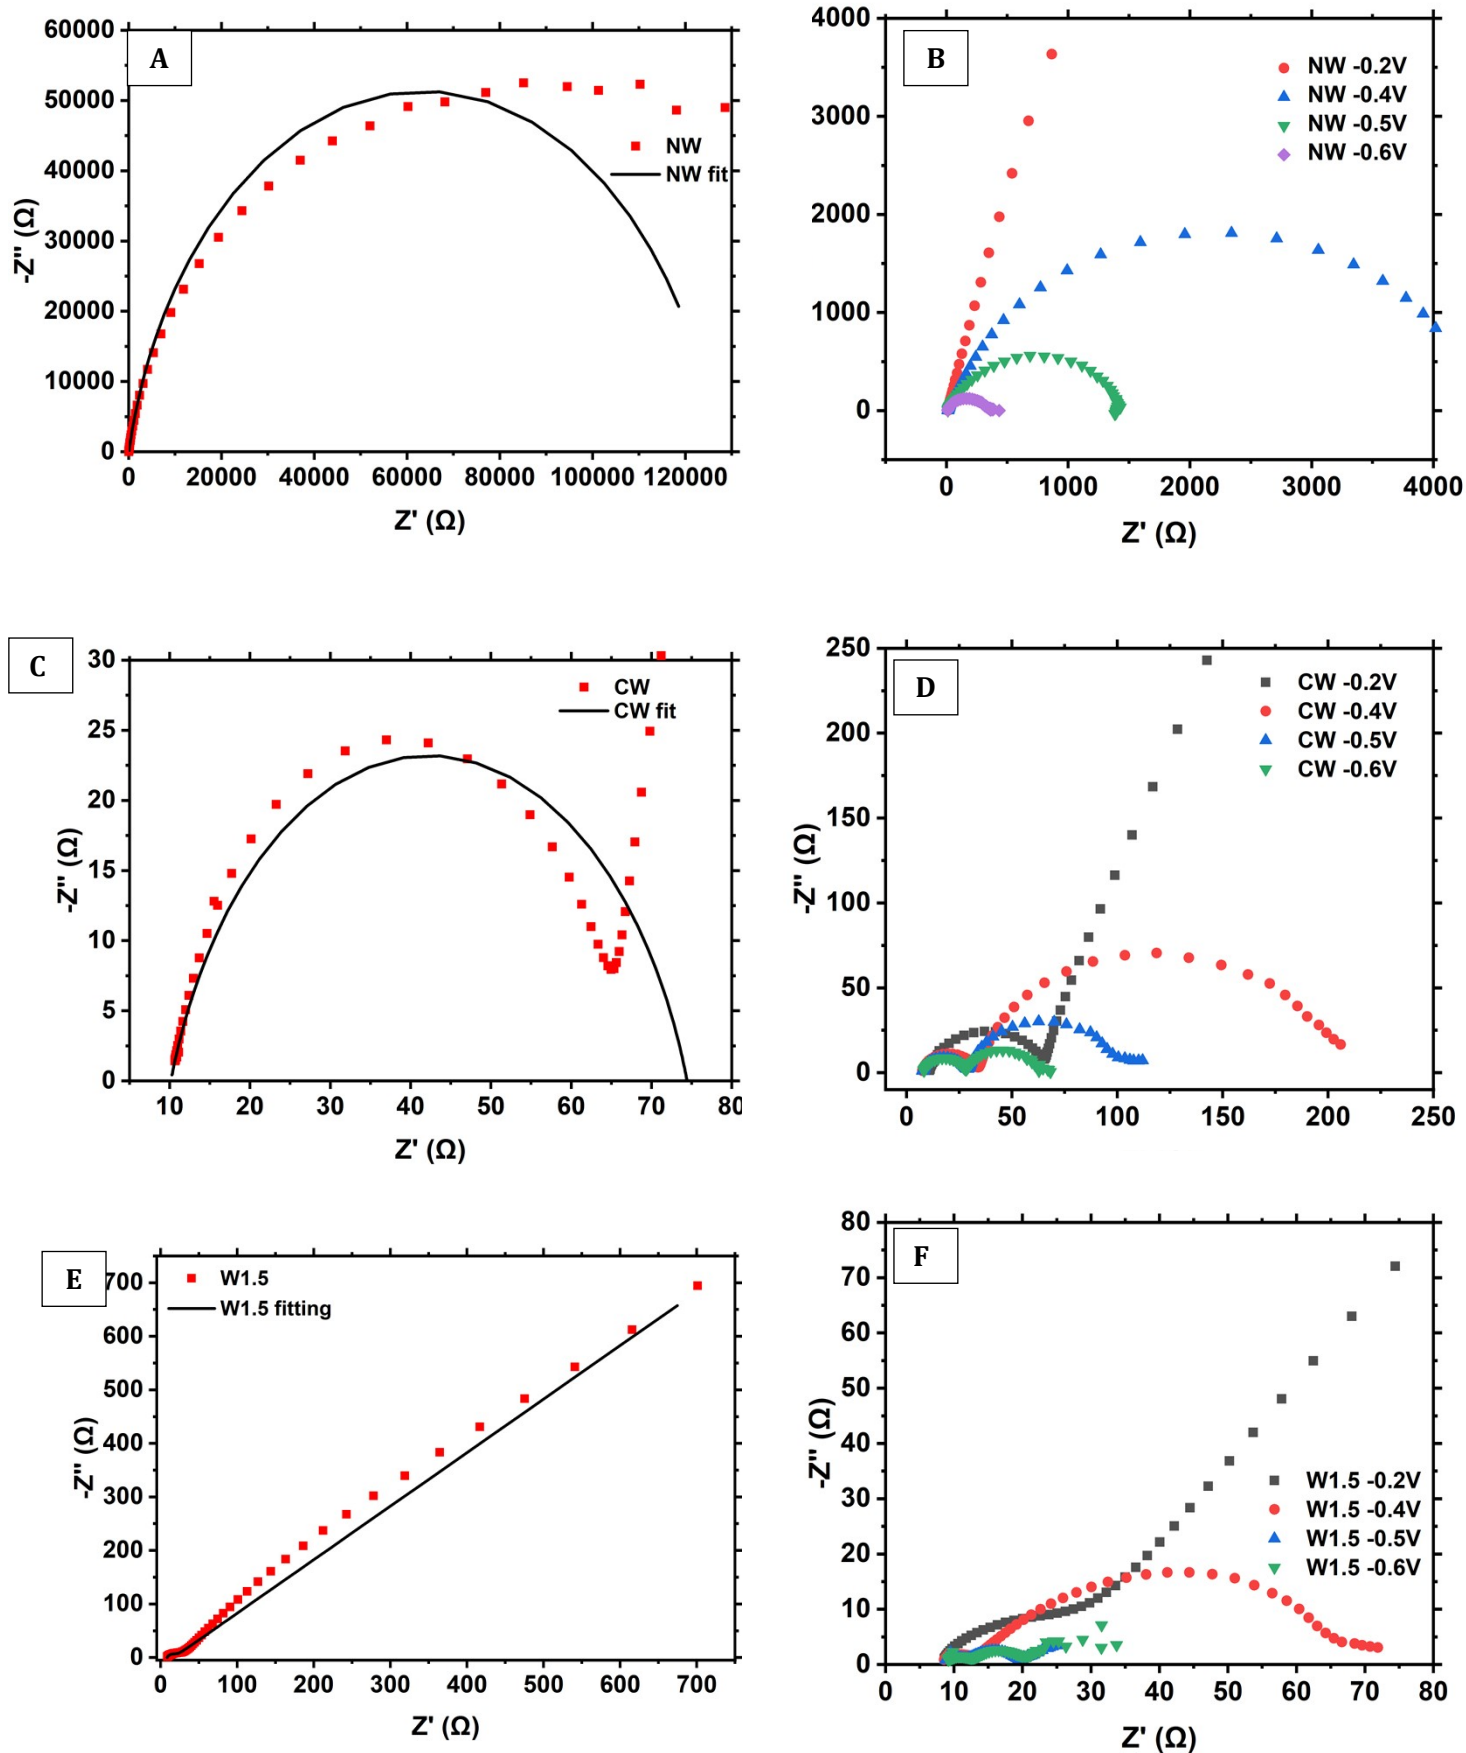

**Figure S16:** Semicircle fitting of EIS at 0.2V for CW (A), NW (C) and W1.5 (E). Zoom view at different applied voltages for CW (B), NW (D) and W1.5 (F).

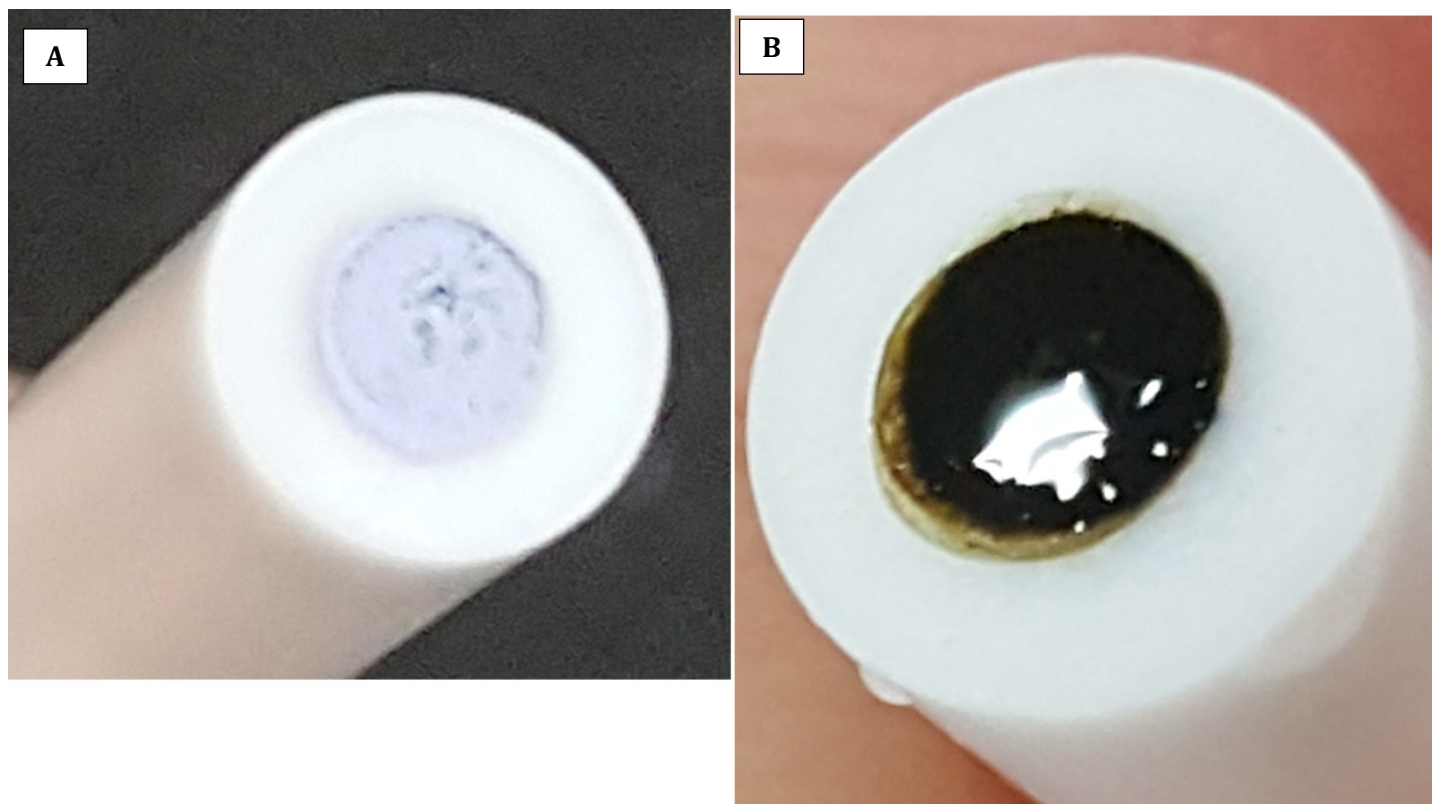

**Figure S17:** W1.5 sample before cyclic voltammetry (A), After cyclic voltammetry (B).  
(white spot is light reflection)

**Table S1:** Relative Standard Deviation data calculations for samples W0.5,W1,W1.5,W2,CW and NW.

| Sample      | Data point 1 | Data point 2 | Standard deviation | RSD % |
|-------------|--------------|--------------|--------------------|-------|
| <b>W0.5</b> | 130          | 138          | 4                  | 2.99  |
| <b>W1</b>   | 88           | 72           | 3                  | 3.53  |
| <b>W1.5</b> | 229          | 217          | 6                  | 2.69  |
| <b>W2</b>   | 140          | 133          | 3.5                | 2.56  |
| <b>CW</b>   | 110          | 98           | 6                  | 5.77  |
| <b>NW</b>   | 1.42         | 1.36         | 0.03               | 2.16  |
